# Supplementary material
Source: PubMed Central journal article supplement (PMC4241241)
Supplement: NIHMS632880-supplement-Supplemental_Table.pdf [file NIHMS632880-supplement-Supplemental_Table.pdf]

## **SUPPLEMENTAL MATERIAL**

**Supplemental Table 1.** CMR measurements of study cohorts at 3 month follow-up examination.

|                                                                                                                                                                                                                                                                                                                                                              | All Subjects<br>(n=65) | No Prior<br>Chemo<br>(n=42) | Prior<br>Chemo<br>(n=23) | No Prior<br>vs Prior<br>Chemo:<br>p-value |
|--------------------------------------------------------------------------------------------------------------------------------------------------------------------------------------------------------------------------------------------------------------------------------------------------------------------------------------------------------------|------------------------|-----------------------------|--------------------------|-------------------------------------------|
| <b><i>CMR Measurements at 3 Month Follow-up</i></b>                                                                                                                                                                                                                                                                                                          |                        |                             |                          |                                           |
| Heart Rate, bpm                                                                                                                                                                                                                                                                                                                                              | 77±15                  | 77±14                       | 75±17                    | 0.59                                      |
| LVEDV, ml                                                                                                                                                                                                                                                                                                                                                    | 113±32                 | 115±31                      | 112±33                   | 0.72                                      |
| LVEDV indexed, ml/m <sup>2</sup>                                                                                                                                                                                                                                                                                                                             | 59±16                  | 58±17                       | 61±13                    | 0.47                                      |
| LVESV, ml                                                                                                                                                                                                                                                                                                                                                    | 51±18                  | 50±16                       | 54±21                    | 0.38                                      |
| LVESV indexed, ml/m <sup>2</sup>                                                                                                                                                                                                                                                                                                                             | 27±9                   | 25±9                        | 29±9                     | 0.08                                      |
| Stroke Volume, ml                                                                                                                                                                                                                                                                                                                                            | 62±18                  | 65±19                       | 57±15                    | 0.13                                      |
| Stroke Volume indexed, ml/m <sup>2</sup>                                                                                                                                                                                                                                                                                                                     | 33±8                   | 34±8                        | 32±7                     | 0.39                                      |
| T2w Relative Enhancement                                                                                                                                                                                                                                                                                                                                     | 1.4±0.3                | 1.4±0.3                     | 1.3±0.3                  | 0.53                                      |
| Myocardial Edema, %                                                                                                                                                                                                                                                                                                                                          | 5.6±11                 | 7.0±13                      | 3.2±6.9                  | 0.15                                      |
| LGE-SI                                                                                                                                                                                                                                                                                                                                                       | 15.9±6.8               | 15.6±6.8                    | 16.5±7.0                 | 0.62                                      |
| LVEF, %                                                                                                                                                                                                                                                                                                                                                      | 54±7                   | 56±6                        | 52±7                     | *0.02                                     |
| <p>Values reported as mean ± standard deviation. <math>p &lt; 0.05</math> considered statistically significant (*).<br/> <math>p</math>-values reported in last column from t-test of differences in means for continuous variables<br/> and Fisher's exact / chi-square tests for categorical differences between subgroups of prior<br/> chemotherapy.</p> |                        |                             |                          |                                           |
